# Supplementary material
Source: Springer Nature journal article supplement (https://www.springermedizin.de/resource/supplementary/12872_2011_430_MOESM5_ESM.pdf/9429968)

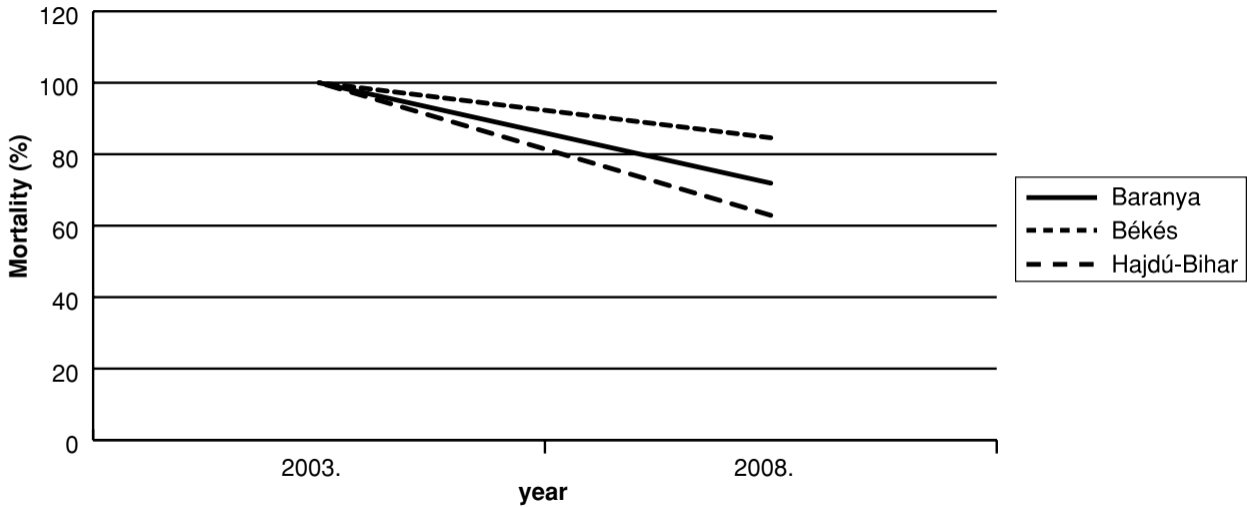

Supplement: MOESM5 [file 9429968]
